# Supplementary material for: Identification of mycoparasitism-related genes against the phytopathogen Sclerotinia sclerotiorum through transcriptome and expression profile analysis in Trichoderma harzianum
Source: PubMed Central journal article supplement (PMC4004048; doi:10.1186/1471-2164-15-204), 2014-03-18
Supplement: 1471-2164-15-204-S6.pdf [file 1471-2164-15-204-S6.pdf]

**Auxiliary Activities**

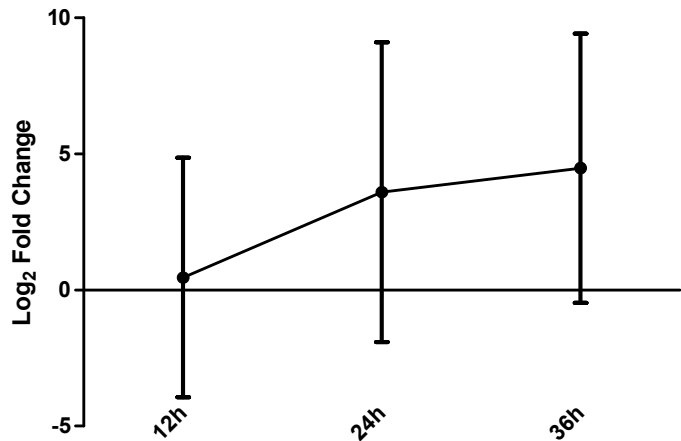

**Carbohydrate Binding Module**

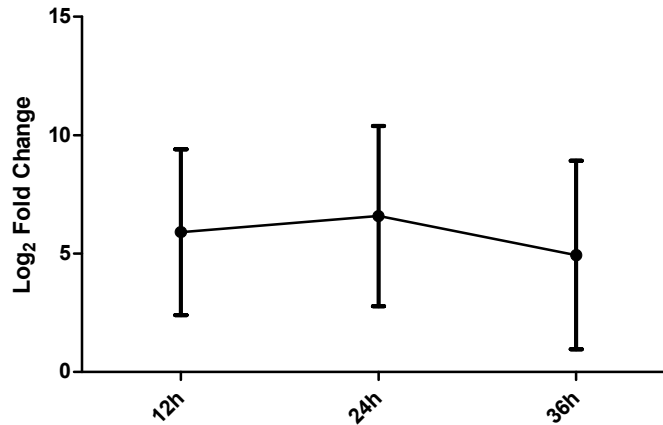

**Carbohydrate Esterases**

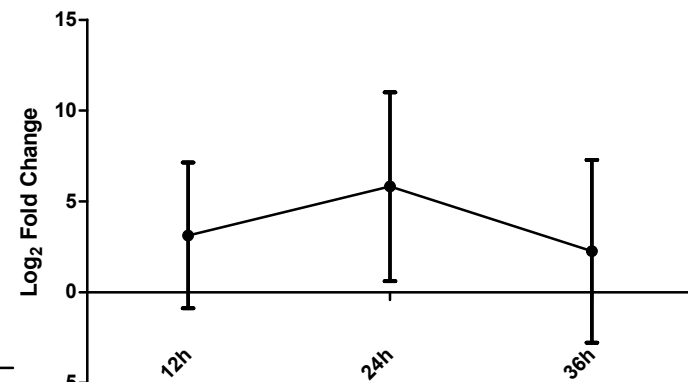

**Glycoside Hydrolase**

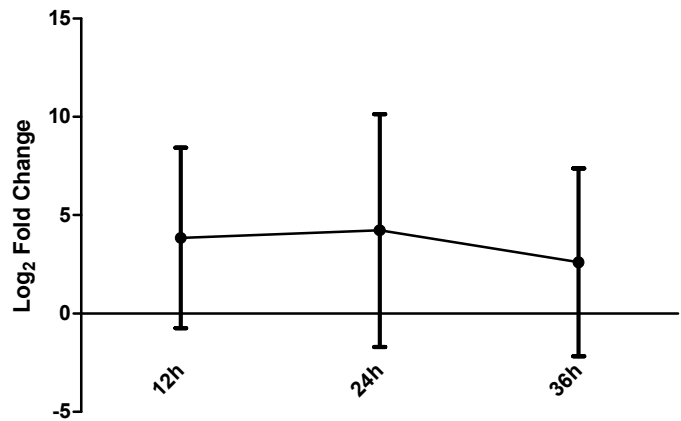

**GlycosylTransferases**

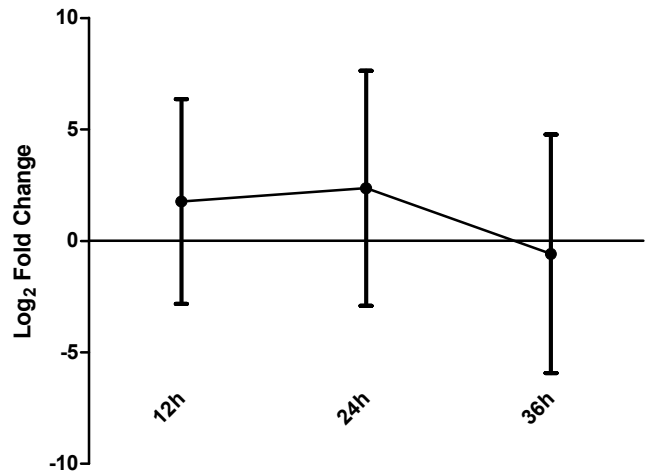

**Polysaccharide Lyases**

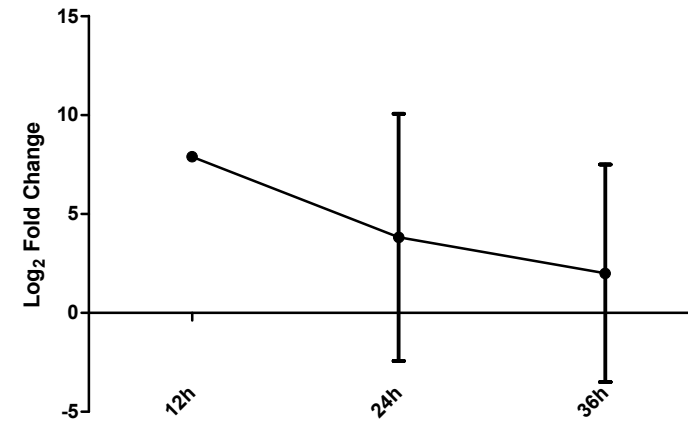

Additional file 7 - log<sub>2</sub> Fold change expression of CAZy classes. The data shown is the average and standard deviation on each time condition.
